# Supplementary material for: Lactoferrin promotes bile acid metabolism and reduces hepatic cholesterol deposition by inhibiting the farnesoid X receptor (FXR)-mediated enterohepatic axis
Source: Royal Society of Chemistry journal article supplement (doi:10.1039/c9fo01616c), 2019-01-01
Supplement: c9fo01616c1.pdf [file c9fo01616c1.pdf]

Supplementary materials

**Table S1.** Levels of BA species (nmol/g)

| BA species       | control          | HFCCD             | LF                | P for control vs. HFCCD | P for HFCCD vs. LF |
|------------------|------------------|-------------------|-------------------|-------------------------|--------------------|
| THCA             | 0.98±1.08        | 0±0               | 36.93±25.22       | 0.050                   | <b>0.005</b>       |
| T- $\alpha$ -MCA | 22.62±16.97      | 74.25±56.44       | 2260.44±1731.15   | 0.057                   | <b>0.011</b>       |
| T- $\beta$ -MCA  | 64.57±42.09      | 181.61±98.78      | 4357.61±4026.13   | <b>0.023</b>            | <b>0.029</b>       |
| TCA              | 60.45±45.1       | 968.21±1188.61    | 24394.09±23912.83 | 0.091                   | <b>0.038</b>       |
| TDCA             | 51.16±37.81      | 765.73±536.4      | 4678.47±4677.87   | <b>0.009</b>            | 0.069              |
| TLCA             | 0.91±1.63        | 4.24±2.61         | 21.22±16.95       | <b>0.024</b>            | <b>0.036</b>       |
| GCA              | 0±0              | 7.02±6.32         | 47.55±27.76       | <b>0.022</b>            | <b>0.006</b>       |
| GDCA             | 2.33±1.57        | 28.75±24.03       | 16.37±10.53       | <b>0.023</b>            | 0.275              |
| CA               | 1103.16±1339.7   | 7988.94±8357.93   | 20332.98±12236.3  | 0.074                   | 0.069              |
| HCA              | 144.11±74.58     | 20.8±7.13         | 29.65±24.93       | <b>0.002</b>            | 0.422              |
| $\alpha$ -MCA    | 1152.55±615.7    | 1106.58±442.81    | 1751.04±637.83    | 0.885                   | 0.069              |
| $\beta$ -MCA     | 3137.58±2055.88  | 2774.44±1551.51   | 4202.42±1690.4    | 0.737                   | 0.158              |
| ACA              | 651.95±755.72    | 483.41±210.32     | 538.2±274.2       | 0.610                   | 0.706              |
| CDCA             | 37.27±29.64      | 297.62±227.41     | 530.11±215.62     | <b>0.019</b>            | 0.099              |
| DCA              | 5193.04±2732.03  | 20003.42±3366.16  | 14881.35±4071.76  | <b>&lt;0.001</b>        | <b>0.039</b>       |
| HDCA             | 220.36±84.17     | 222.85±27.86      | 115.52±62.45      | 0.947                   | <b>0.003</b>       |
| UDCA             | 101.6±47.43      | 54.67±46.85       | 162.44±60.11      | 0.115                   | <b>0.006</b>       |
| nutriCA          | 13.28±8.78       | 4.88±5.36         | 26.14±9.94        | 0.073                   | <b>0.001</b>       |
| 12-ketoDCA       | 546.34±292.83    | 1873.68±426.35    | 1112.94±376.45    | <b>&lt;0.001</b>        | <b>0.008</b>       |
| LCA              | 175.9±90.02      | 186.63±99.39      | 100.34±57.86      | 0.849                   | 0.096              |
| iso-LCA          | 63.54±60.14      | 32.82±13.34       | 10.35±9.34        | 0.250                   | <b>0.007</b>       |
| $\omega$ -MCA    | 3274.38±987.89   | 1610.58±335.73    | 1577.52±839.91    | <b>0.003</b>            | 0.930              |
| Conjugated BAs   | 203.01±132.72    | 2029.81±1737.32   | 35812.66±33892.26 | <b>0.028</b>            | <b>0.035</b>       |
| BAs              | 16018.08±8115.82 | 38691.12±13759.36 | 81183.69±39867.46 | <b>0.006</b>            | <b>0.033</b>       |

Abbreviation: THCA, Taurohyocholic Acid; T- $\alpha$ -MCA, Tauro-Alpha-Muricholic Acid; T- $\beta$ -MCA, Tauro-Beta-Muricholic Acid; TCA, Taurocholic Acid; TDCA, Taurodeoxycholic Acid; TLCA, Tauroolithocholic Acid; GCA, Glycocholic Acid; GDCA, Glycodeoxycholic Acid; CA, Cholic Acid; HCA, Hyocholic Acid;  $\alpha$ -MCA, Alpha-Muricholic Acid;  $\beta$ -MCA, Beta-Muricholic Acid; ACA, Allocholic Acid; CDCA, Chenodeoxycholic Acid; DCA, Deoxycholic Acid; HDCA, Hyodeoxycholic Acid; UDCA, Ursodeoxycholic Acid; nutriCA, Nutriacholic Acid; 12-ketoDCA, 12-Ketodeoxycholic Acid; LCA, Lithocholic Acid; iso-LCA, Isolithocholic Acid;  $\omega$ -MCA, Omega-Muricholic Acid.
